# Supplementary material
Source: PubMed Central journal article supplement (PMC5527646)
Supplement: AAC.00166-17_zac007176351s1.pdf [file AAC.00166-17_zac007176351s1.pdf]

## **Supplemental Material**

### **Sensitivity of White and Opaque *Candida albicans* to Antifungal Drugs**

Veronica B. Craik<sup>a</sup>, Alexander D. Johnson<sup>a,b</sup>, Matthew B. Lohse<sup>a,1</sup>

<sup>a</sup>Department of Microbiology and Immunology, University of California, San Francisco, San Francisco, CA 94158, USA

<sup>b</sup>Department of Biochemistry and Biophysics, University of California, San Francisco, San Francisco, CA 94158, USA

<sup>1</sup>Address correspondence to: Matthew B. Lohse ([matthew.lohse@ucsf.edu](mailto:matthew.lohse@ucsf.edu))

Table S1: Strains used in this study

| Name       | Strain Background                                                                                                                                                                                                          | Cell Type | Genotype                                                                                                                                   | Source     |
|------------|----------------------------------------------------------------------------------------------------------------------------------------------------------------------------------------------------------------------------|-----------|--------------------------------------------------------------------------------------------------------------------------------------------|------------|
| MLY613     | SC5314                                                                                                                                                                                                                     | White     | <i>a/a C.m.LEU2/leu2Δ C.d.HIS1/his1Δ</i><br><i>URA3/ura3Δ::imm<sup>434</sup> IRO1/iro1Δ::imm<sup>434</sup></i><br><i>TEF2/TEF2-mCherry</i> | This study |
| MLY629     | SC5314                                                                                                                                                                                                                     | Opaque    | <i>a/a C.m.LEU2/leu2Δ C.d.HIS1/his1Δ</i><br><i>URA3/ura3Δ::imm<sup>434</sup> IRO1/iro1Δ::imm<sup>434</sup></i><br><i>TEF2/TEF2-GFP</i>     | This study |
| MLY1477    | WO-1                                                                                                                                                                                                                       | White     | alpha/alpha                                                                                                                                | 1          |
| MLY1480    | WO-1                                                                                                                                                                                                                       | Opaque    | alpha/alpha                                                                                                                                | 1          |
| References |                                                                                                                                                                                                                            |           |                                                                                                                                            |            |
| 1          | <b>Slutsky B, Staebell M, Anderson J, Risen L, Pfaller M, Soll DR. 1987.</b><br>"White-opaque transition": a second high-frequency switching system in <i>Candida albicans</i> . <i>J. Bacteriol.</i> <b>169</b> :189–197. |           |                                                                                                                                            |            |

Table S2: Antifungal Drugs used in this study

| Drug                      | Class                        | Stock Solution | Solvent | Supplier    |
|---------------------------|------------------------------|----------------|---------|-------------|
| Amphotericin B            | Polyene                      | 250µg/mL       | Water   | Sigma       |
| Caspofungin               | Echinocandin                 | 1mg/mL         | Water   | Merck       |
| Fluconazole               | Triazole                     | 3mg/mL         | Water   | Sigma       |
| Flucytosine               | Other                        | 10mM           | DMSO    | MicroSource |
| Terconazole               | Triazole                     | 10mM           | DMSO    | MicroSource |
| Tioconazole               | Imidazole                    | 10mM           | DMSO    | MicroSource |
| Abafungin                 | Thiazole                     | 10mM           | DMSO    | SCBT        |
| Micafungin                | Echinocandin                 | 10mM           | DMSO    | SCBT        |
| Anidulafungin             | Echinocandin                 | 10mM           | DMSO    | SCBT        |
| Griseofulvin              | Other                        | 10mM           | DMSO    | MicroSource |
| Ciclopirox Olamine        | Other                        | 10mM           | DMSO    | MicroSource |
| Clotrimazole              | Imidazole                    | 10mM           | DMSO    | MicroSource |
| Ketoconazole              | Imidazole                    | 10mM           | DMSO    | MicroSource |
| Miconazole Nitrate        | Imidazole                    | 10mM           | DMSO    | MicroSource |
| Nystatin                  | Polyene                      | 10mM           | DMSO    | MicroSource |
| Tolnaftate                | Other                        | 10mM           | DMSO    | MicroSource |
| Sulconazole Nitrate       | Imidazole                    | 10mM           | DMSO    | MicroSource |
| Econazole Nitrate         | Imidazole                    | 10mM           | DMSO    | MicroSource |
| Voriconazole              | Triazole                     | 10mM           | DMSO    | MicroSource |
| Amorolfine Hydrochloride  | Squalene Epoxidase Inhibitor | 10mM           | DMSO    | MicroSource |
| Candidin                  | Polyene                      | 10mM           | DMSO    | MicroSource |
| Butoconazole              | Imidazole                    | 10mM           | DMSO    | MicroSource |
| Bifonazole                | Imidazole                    | 10mM           | DMSO    | MicroSource |
| Oxiconazole Nitrate       | Imidazole                    | 10mM           | DMSO    | MicroSource |
| Terbinafine Hydrochloride | Squalene Epoxidase Inhibitor | 10mM           | DMSO    | MicroSource |
| Natamycin                 | Polyene                      | 10mM           | DMSO    | MicroSource |
| Itraconazole              | Triazole                     | 10mM           | DMSO    | MicroSource |
